# Supplementary material for: Nuclear quantum dynamics on the ground electronic state of neutral silver dimer 107Ag109Ag probed by femtosecond NeNePo spectroscopy
Source: Royal Society of Chemistry journal article supplement (doi:10.1039/d3cp02055j), 2023-01-01
Supplement: d3cp02055j1.pdf [file d3cp02055j1.pdf]

## Supplementary Information

### Nuclear Quantum Dynamics on the Ground Electronic State of Neutral Silver Dimer $^{107}\text{Ag}^{109}\text{Ag}$ Probed by Femtosecond NeNePo Spectroscopy

*Jiaye Jin, \* Max Grellmann, and Knut R. Asmis\**

Wilhelm-Ostwald-Institut für Physikalische und Theoretische Chemie,  
Universität Leipzig, Linnéstr. 2, 04103 Leipzig, Germany

E-mail: Jiaye.jin@uni-leipzig.de; knut.asmis@uni-leipzig.de

#### Contents

|                                 |    |
|---------------------------------|----|
| 1. Fs-NeNePo Spectra .....      | 2  |
| 2. FFT Spectra .....            | 4  |
| 3. Dunham Expression .....      | 6  |
| 4. Simulated Oscillations ..... | 8  |
| 5. FFT Band List .....          | 10 |
| References .....                | 11 |

## 1. Fs-NeNePo Spectra

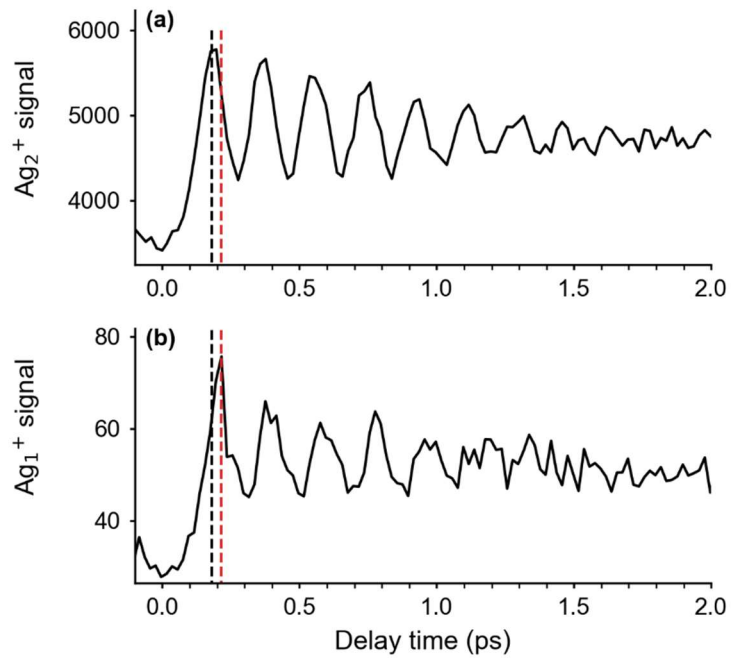

**Fig. S1:** NeNePo spectra ( $\lambda_{\text{pump}} = 510$  nm,  $\lambda_{\text{probe}} = 402$  nm) obtained by monitoring (a) the  $^{107,109}\text{Ag}_2^+$  fragment and (b) the  $^{107}\text{Ag}^+$  fragment over a delay time of -0.1 to 2.0 ps. Black (red) dashed line marks the delay time of the first maximum in the  $\text{Ag}_2^+$  ( $\text{Ag}^+$ ) ion signal.

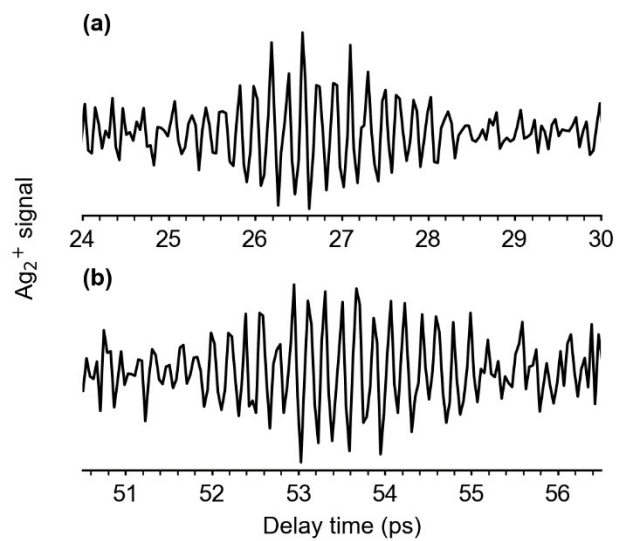

**Fig. S2:** Recurrences of  $\text{Ag}_2^+$  cation signal measured by NeNePo excitation ( $\lambda_{\text{pump}} = 1010$  nm,  $\lambda_{\text{probe}} = 402$  nm). (a) Delay time from 24 to 30 ps for the first recurrence of the wave packet. (b) Delay time from 51 ps to 58 ps for the second recurrence.

## 2. FFT Spectra

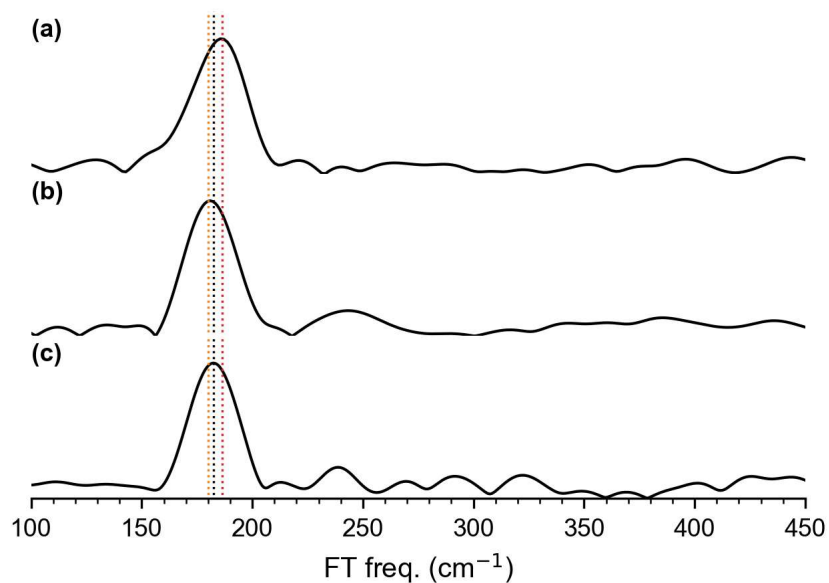

**Fig. S3:** The fast Fourier transform (FFT) analysis of the NeNePo spectra from 0 ps to 2.5 ps delay time. (a)  $\lambda_{\text{pump}} = 510$  nm, (b)  $\lambda_{\text{pump}} = 1010$  nm, (c)  $\lambda_{\text{pump}} = 1140$  nm. The maximum frequency position depends on the pump wavelength:  $186.5$  cm<sup>-1</sup> at 510 nm (red dashed line),  $180.0$  cm<sup>-1</sup> at 1010 nm (yellow dashed line), and  $182.5$  cm<sup>-1</sup> at 1140 nm (green dashed line).

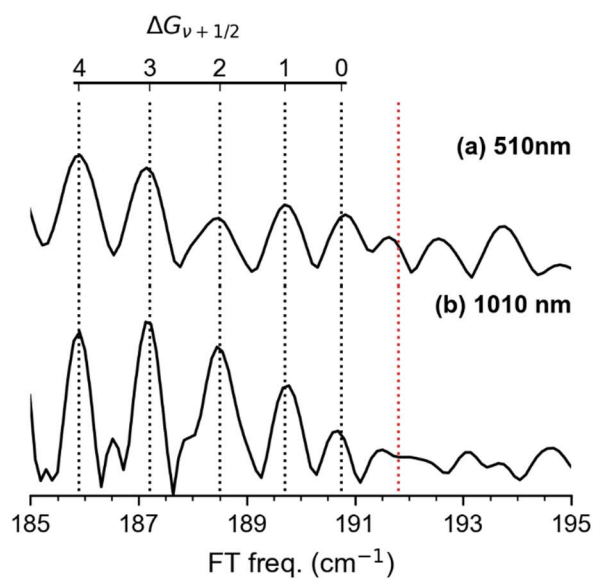

**Fig. S4:** The fast Fourier transform (FFT) analysis of the NeNePo spectra in the frequency range from  $185 \text{ cm}^{-1}$  to  $195 \text{ cm}^{-1}$  for the time range of 0 ps - 60 ps for (a)  $\lambda_{\text{pump}} = 510 \text{ nm}$  and (b)  $\lambda_{\text{pump}} = 1010 \text{ nm}$ . The tentative assignment of the  $\Delta G_{v+1/2}$  values is shown in black.

### 3. Dunham Expression

The Dunham expression is extended to the cubic anharmonic contents  $\omega_e y_e$  in order to fit  $\Delta G_{v+1/2}$  of highly-lying vibrational levels, which presents in Eq. 1. The molecular constants for the  $\text{Ag}_2$  ground electronic state  $X^1\Sigma_g^+$  are evaluated by applying a non-linear least-squares fit to the Eq. 2.

$$G(v) = \omega_e \left( v + \frac{1}{2} \right) - \omega_e x_e \left( v + \frac{1}{2} \right)^2 + \omega_e y_e \left( v + \frac{1}{2} \right)^3 \quad (1)$$

$$\Delta G_{v+\frac{1}{2}} = G_{v+1} - G_v = \omega_e - 2\omega_e x_e (v + 1) + 3\omega_e y_e \left( v^2 + 2v + \frac{26}{24} \right) \quad (2)$$

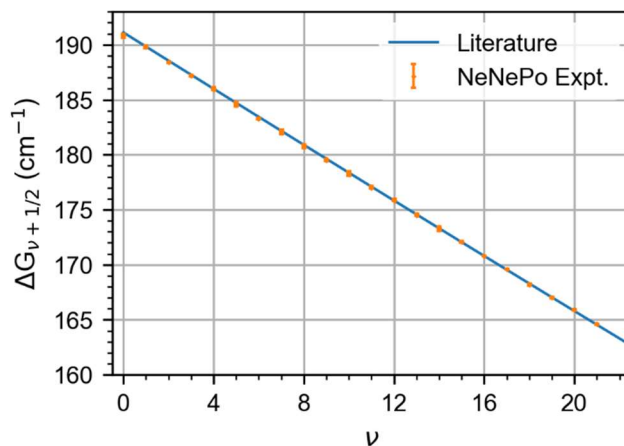

**Fig. S5:** Experimental FFT frequencies of vibrational levels (in orange) and a  $\Delta G_{v+1/2}$  vs  $v$  plot (blue) for the  $^{107}\text{Ag}^{109}\text{Ag}$  isotopologue. The literature molecular constants are obtained from vibrationally resolved absorption spectroscopy of  $\text{Ag}_2$  from Ref. 1. We also fit molecular constants with an assignment of  $\Delta G_{1/2} = 193.4 \text{ cm}^{-1}$ . The resulting constants and the Birge-Sponer plot are given in Fig. S6. The constants show worse agreement. These indicate that the FT frequency band at  $193.4 \text{ cm}^{-1}$  is an artifact resulting from the fast Fourier transformation.

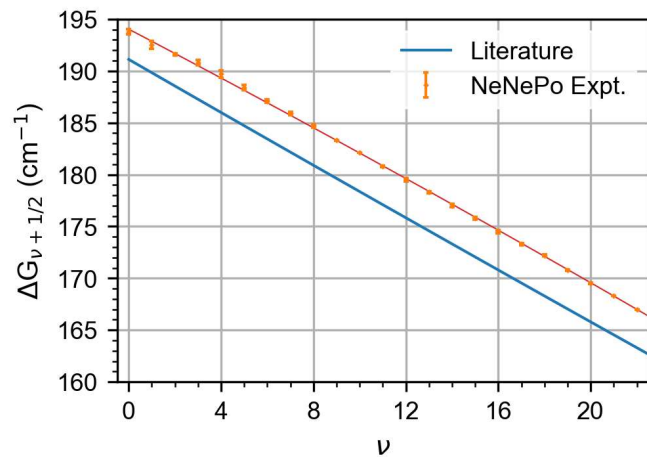

**Fig. S6:** Experimental FFT frequencies of vibrational levels (in orange) and a  $\Delta G_{v+1/2}$  vs  $v$  plot (blue) for  $^{107}\text{Ag}^{109}\text{Ag}$  isotopologue. The experimental  $\Delta G_{v+1/2}$  values are taken from the assignment that the  $\Delta G_{1/2}$  ( $v = 0$ ) is at  $193.8 \text{ cm}^{-1}$ . The resulting vibrational constants are  $\omega_e = 195.2(2) \text{ cm}^{-1}$ ,  $\omega_e x_e = 0.581(13) \text{ cm}^{-1}$  and  $\omega_e y_e = -0.9(3) \cdot 10^{-3} \text{ cm}^{-1}$ . The literature molecular constants are obtained from Ref. 1.

#### 4. Simulated Oscillations

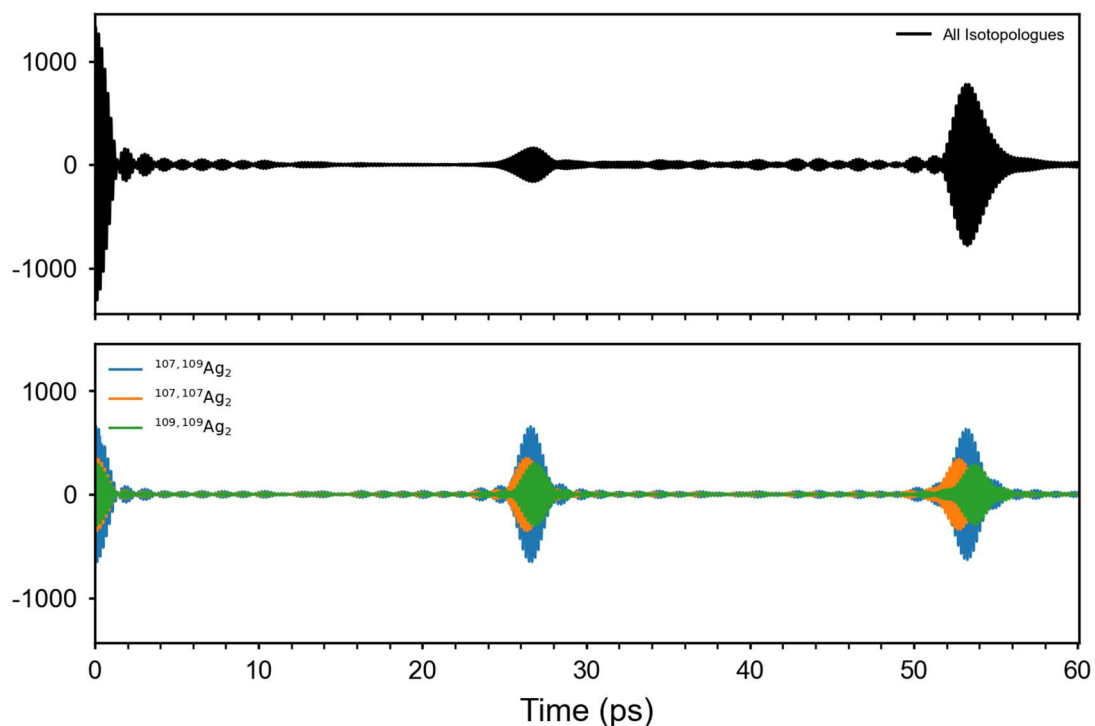

**Fig. S7:** Simulated oscillations reflecting the vibrational wave packet dynamics for silver dimers in the delay time range 0 ps – 60 ps. The plotting represents the sum over all frequency contribution, each represented by a sinusoidal function  $f(t) = A\sin(2\pi t/T + \phi)$  corresponding to the classical wave. The intensities and frequencies of the  $^{107,109}\text{Ag}_2$  isotopologue are taken from the experimental FT amplitudes and FT frequencies of the fs-NeNePo spectrum with  $\lambda_{\text{pump}} = 510$  nm. The initial phase is set to zero for simplification. The frequency values of the two minor isotopologues ( $^{107,107}\text{Ag}_2$  and  $^{109,109}\text{Ag}_2$ ) are calculated from the vibrational constants, which are shifted from  $^{107,109}\text{Ag}_2$  by the ratio of the reduced mass (see Section 4 of the main article). Their relative intensities are calculated by the natural abundance. Magnified sections of the simulations are given in Fig. S8.



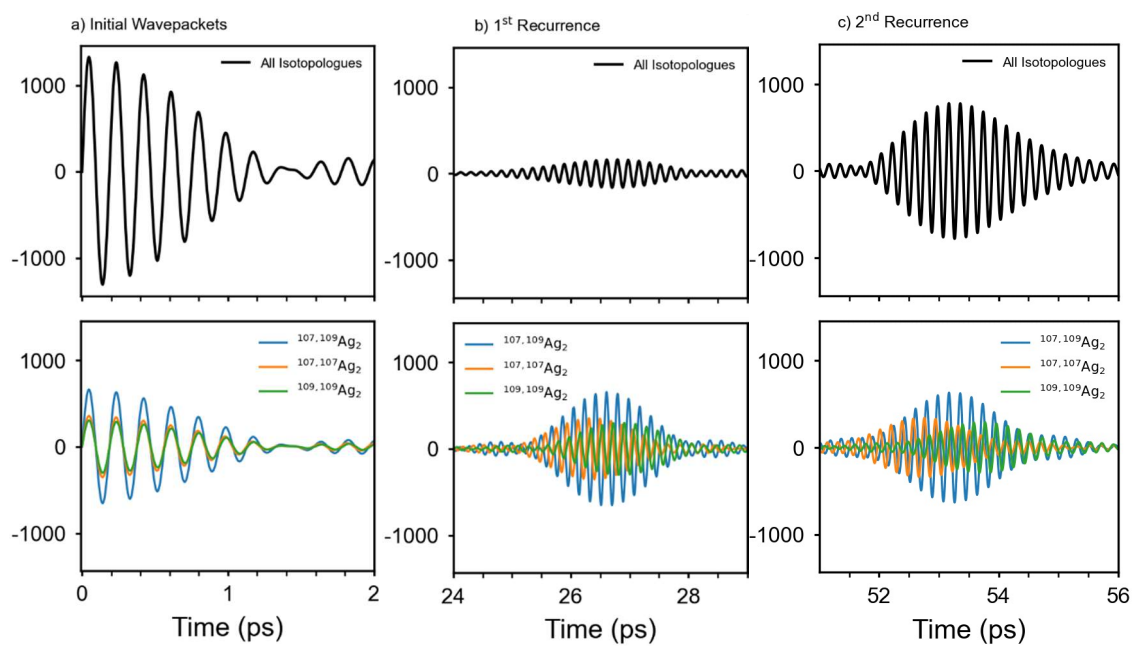

**Fig. S8:** Magnified sections of the simulations in Fig. S7 for different delay times: (a) 0 ps to 2 ps time (initial oscillation), (b) 24 ps to 29 ps time (first recurrence) and (c) 51 ps to 56 ps (second recurrence).

## 5. FFT Band List

Table S1: FFT band frequencies for  $\Delta G_{v+1/2}$  for the  $X^1\Sigma_g^+$  ground state of  $\text{Ag}_2$ . Observed and calculated positions, residuals (Obs. – Calc.) and assignments (Ass.) are listed. All values are in  $\text{cm}^{-1}$ .

| $\lambda_{\text{pump}} = 510 \text{ nm}$ |       |      |       | $\lambda_{\text{pump}} = 1010 \text{ nm}$ |       |      |       |
|------------------------------------------|-------|------|-------|-------------------------------------------|-------|------|-------|
| Obs.                                     | Calc. | Res. | Ass.  | Obs.                                      | Calc. | Res. | Ass.  |
| 190.9                                    | 191.0 | -0.1 | 1-0   | 190.8                                     | 190.9 | -0.1 | 1-0   |
| 189.8                                    | 189.7 | 0.1  | 2-1   | 189.8                                     | 189.7 | 0.1  | 2-1   |
| 188.4                                    | 188.5 | -0.1 | 3-2   | 188.4                                     | 188.5 | -0.1 | 3-2   |
| 187.2                                    | 187.2 | 0.0  | 4-3   | 187.2                                     | 187.2 | 0.0  | 4-3   |
| 186.0                                    | 185.9 | 0.1  | 5-4   | 185.9                                     | 185.9 | 0.0  | 5-4   |
| 184.7                                    | 184.8 | 0.1  | 6-5   | 184.5                                     | 184.5 | 0.1  | 6-5   |
| 183.3                                    | 183.4 | -0.1 | 7-6   | 183.3                                     | 183.4 | -0.1 | 7-6   |
| 182.2                                    | 182.1 | 0.1  | 8-7   | 182.0                                     | 182.0 | 0.0  | 8-7   |
| 180.9                                    | 180.8 | 0.1  | 9-8   | 180.7                                     | 180.8 | -0.1 | 9-8   |
| 179.6                                    | 179.6 | 0.0  | 10-9  | 179.5                                     | 179.6 | -0.1 | 10-9  |
| 178.4                                    | 178.3 | 0.1  | 11-10 | 178.2                                     | 178.3 | -0.1 | 11-10 |
| 177.1                                    | 177.1 | 0.0  | 12-11 | 177.0                                     | 177.0 | 0.0  | 12-11 |
| 175.9                                    | 175.8 | 0.1  | 13-12 | 175.8                                     | 175.8 | 0.0  | 13-12 |
| 174.6                                    | 174.5 | 0.1  | 14-13 | 174.5                                     | 174.5 | 0.0  | 14-13 |
| 173.4                                    | 173.3 | 0.1  | 15-14 | 173.2                                     | 173.3 | -0.1 | 15-14 |
| 172.1                                    | 172.0 | 0.0  | 16-15 |                                           |       |      |       |
| 170.8                                    | 170.7 | 0.0  | 17-16 |                                           |       |      |       |
| 169.6                                    | 169.5 | 0.1  | 18-17 |                                           |       |      |       |
| 168.2                                    | 168.3 | -0.1 | 19-18 |                                           |       |      |       |
| 167.0                                    | 167.1 | -0.1 | 20-19 |                                           |       |      |       |
| 165.9                                    | 165.8 | 0.1  | 21-20 |                                           |       |      |       |
| 164.6                                    | 164.6 | 0.0  | 22-21 |                                           |       |      |       |

## References

1. B. Kleman and S. Lindkvist, *Ark. Fys.*, 1955, **9**(4), 385.
